# Supplementary material for: Analysis of the Chloroplast Genome of Ficus simplicissima Lour Collected in Vietnam and Proposed Barcodes for Identifying Ficus Plants
Source: MDPI journal article supplement (doi:10.3390/cimb45020067), 2023-01-27
Supplement: s1 [file s1]

# SUPPLEMENTARY 1

**Table S1.** Gene contents in the complete chloroplast genome of *Ficus simplicissima* m3

| Classification of Genes |                                    | Name of Genes                                                                                                                                                                                                                                                                                                                            | Number |
|-------------------------|------------------------------------|------------------------------------------------------------------------------------------------------------------------------------------------------------------------------------------------------------------------------------------------------------------------------------------------------------------------------------------|--------|
| RNA genes               | Ribosomal RNAs                     | <i>rrn4.5(x2), rrn5(x2), rrn16(x2), rrn23(x2)<sup>a</sup></i>                                                                                                                                                                                                                                                                            | 8      |
|                         | Transfer RNAs                      | <i>trnA_UGC(x2)<sup>a</sup>, trnC_GCA, trnD_GUC, trnE_UUC, trnF_GAA, trnFM_CAU, trnG_GCC, trnG_UCC, trnH_GUG, trnI_CAU(x2), trnI_GAU(x2)<sup>a</sup>, trnL_CAA(x2), trnL_UAA, trnL_UAG, trnM_CAU, trnN_GUU(x2), trnP_UGG, trnQ_UUG, trnR_ACG(x2), trnR_UCU, trnS_GCU, trnS_GGA, trnS_UGA, trnT_UGU, trnV_GAC(x2), trnW_CCA, trnY_GUA</i> | 34     |
| Protein-coding genes    | Photosystem I                      | <i>psaA, psaB, psaC, psaI, psaJ</i>                                                                                                                                                                                                                                                                                                      | 5      |
|                         | Photosystem II                     | <i>psbA, psbB, psbC, psbD, psbE, psbF, psbH, psbI, psbJ, psbK, psbL, psbM, psbT, psbZ</i>                                                                                                                                                                                                                                                | 14     |
|                         | Cytochrome                         | <i>petA, petB<sup>a</sup>, petD<sup>a</sup>, petG, petL, petN</i>                                                                                                                                                                                                                                                                        | 6      |
|                         | ATP synthase                       | <i>atpA, atpB, atpE, atpF<sup>a</sup>, atpH, atpI</i>                                                                                                                                                                                                                                                                                    | 6      |
|                         | Rubisco                            | <i>rbcL</i>                                                                                                                                                                                                                                                                                                                              | 1      |
|                         | NADH dehydrogenease - like complex | <i>ndhA<sup>a</sup>, ndhB(x2)<sup>a</sup>, ndhC, ndhD, ndhE, ndhF, ndhG, ndhH, ndhI, ndhJ, ndhK</i>                                                                                                                                                                                                                                      | 12     |
|                         | Ribosomal proteins - small units   | <i>rps11, rps12(x2)<sup>a</sup>, rps14, rps15, rps16<sup>a</sup>, rps18, rps19, rps2, rps3, rps4, rps7(x2), rps8</i>                                                                                                                                                                                                                     | 15     |
|                         | Ribosomal proteins - large units   | <i>rpl14, rpl16<sup>a</sup>, rpl2(x2)<sup>a</sup>, rpl20, rpl22, rpl23(x2), rpl32, rpl33, rpl36</i>                                                                                                                                                                                                                                      | 11     |
|                         | RNA polymerase                     | <i>rpoA, rpoB, rpoCI<sup>a</sup>, rpoC2</i>                                                                                                                                                                                                                                                                                              | 4      |

|       |                                                     |                                                                                  |     |
|-------|-----------------------------------------------------|----------------------------------------------------------------------------------|-----|
|       | Miscellaneous                                       | <i>accD</i> , <i>ccsA</i> , <i>cemA</i> , <i>clpP1<sup>b</sup></i> , <i>matK</i> | 5   |
|       | Hypothetical<br>chloroplast reading<br>frames (ycf) | <i>ycf1(x2)</i> , <i>ycf2(x2)</i> , <i>ycf3<sup>b</sup></i> , <i>ycf4</i>        | 6   |
| Total |                                                     |                                                                                  | 127 |

*Notes:* Genes marked with the sign are the gene with a single (a) or double (b) introns and duplicated genes (×2).

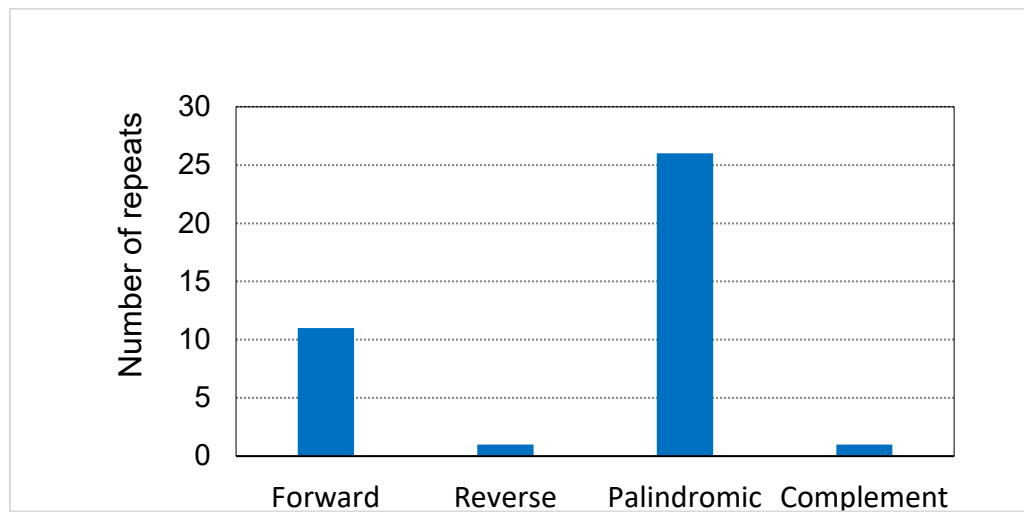

**Figure S1.** The long repeat sequences in the cp genome of *F. simplicissima* m3
